# Supplementary material for: Multiregional origins of the domesticated tetraploid wheats
Source: PLoS One. 2020 Jan 22;15(1):e0227148. doi: 10.1371/journal.pone.0227148 (PMC6975532; doi:10.1371/journal.pone.0227148)
Supplement: S1 Table — (XLSX) [file pone.0227148.s009.xlsx]

## Sheet: S1 Table
S1 Table. Wheat accessions used in this study.
Accession number	Lab code	Common name	Taxon	Germplasm taxon ID (where different)	Collection site			Wild emmer geographical division	Inclusion in allele sharing analysis	Comments
					Country	Latitude	Longitude
PI 560697	158	Timopheev's wheat - wild	Triticum timopheevii subsp. armeniacum	Triticum turgidum subsp. dicoccoides	Turkey	37.5833	42.3833
PI 560873	160	Timopheev's wheat - wild	Triticum timopheevii subsp. armeniacum	Triticum turgidum subsp. dicoccoides	Turkey	37.47	42.03
PI 560877	161	Timopheev's wheat - wild	Triticum timopheevii subsp. armeniacum	Triticum turgidum subsp. dicoccoides	Turkey	38.13	41.26
PI 656869	185	Timopheev's wheat - wild	Triticum timopheevii subsp. armeniacum	Triticum turgidum subsp. dicoccoides	Turkey	37.2214	37.3303
PI 656871	186	Timopheev's wheat - wild	Triticum timopheevii subsp. armeniacum	Triticum turgidum subsp. dicoccoides	Turkey	37.1611	37.1202			Uncertain taxonomy (see Table S5)
PI 656872	187	Timopheev's wheat - wild	Triticum timopheevii subsp. armeniacum	Triticum turgidum subsp. dicoccoides	Turkey	37.2026	37.0925
PI 656873	188	Timopheev's wheat - wild	Triticum timopheevii subsp. armeniacum	Triticum turgidum subsp. dicoccoides	Turkey	37.1939	37.0944
CGN16098	201	Timopheev's wheat - wild	Triticum timopheevii subsp. armeniacum	Triticum turgidum subsp. dicoccoides	Caspian	37.2808	49.5831
CGN16102	204	Timopheev's wheat - wild	Triticum timopheevii subsp. armeniacum	Triticum turgidum subsp. dicoccoides	Iraq	33.138	44.4333
CGN13161	210	Timopheev's wheat - wild	Triticum timopheevii subsp. armeniacum	Triticum turgidum subsp. dicoccoides	Iraq	33.639	44.4333
PI 654340	224	Timopheev's wheat - wild	Triticum timopheevii subsp. armeniacum		Turkey	37.3636	37.5386
PI 352264	225	Timopheev's wheat - wild	Triticum timopheevii subsp. armeniacum		Armenia	40.184	44.5167
CItr 17680	227	Timopheev's wheat - wild	Triticum timopheevii subsp. armeniacum		Iran	34.3333	46.1333
PI 352265	228	Timopheev's wheat - wild	Triticum timopheevii subsp. armeniacum		Azerbaijan	40.5	45
PI 427308	229	Timopheev's wheat - wild	Triticum timopheevii subsp. armeniacum		Iraq	36.4	44.2
PI 427347	230	Timopheev's wheat - wild	Triticum timopheevii subsp. armeniacum		Iraq	36.9167	43.0333
PI 427354	231	Timopheev's wheat - wild	Triticum timopheevii subsp. armeniacum		Iraq	35.7667	45.1333			Uncertain taxonomy (see Table S5)
PI 596290	232	Timopheev's wheat - wild	Triticum timopheevii subsp. armeniacum		Turkey	37.7167	42.25
CItr 17677	17677	Timopheev's wheat - wild	Triticum timopheevii subsp. armeniacum		Turkey	38.9833	39.5
CItr 17678	17678	Timopheev's wheat - wild	Triticum timopheevii subsp. armeniacum		Armenia	40.1833	44.5167
CGN24296	24296	Timopheev's wheat - wild	Triticum timopheevii subsp. armeniacum	Triticum turgidum subsp. dicoccoides	Iraq	33.334	44.4333
PI 352510	215	Timopheev's wheat - domesticated	Triticum timopheevii subsp. timopheevii		Georgia	42.9164	43.0114
PI 355705	216	Timopheev's wheat - domesticated	Triticum timopheevii subsp. timopheevii		Germany	48.1333	11.5667
PI 300991	221	Timopheev's wheat - domesticated	Triticum timopheevii subsp. timopheevii		Israel	32.9114	35.5639
PI 119442	222	Timopheev's wheat - domesticated	Triticum timopheevii subsp. timopheevii		Turkey	41.2422	33.3283
PI 572916	301	Timopheev's wheat - domesticated	Triticum timopheevii subsp. timopheevii		Georgia	42.66	42.7811
Citr 15590	15590	Timopheev's wheat - domesticated	Triticum timopheevii subsp. timopheevii		Greece	37.9667	23.7167
PI 251018	251018	Timopheev's wheat - domesticated	Triticum timopheevii subsp. timopheevii		Uzbekistan	41.3333	69.3			Uncertain taxonomy (see Table S5)
PI 352322	72	Emmer - wild	Triticum turgidum subsp. dicoccoides		Lebanon	33.4167	35.8667	south	south
PI 355459	77	Emmer - wild	Triticum turgidum subsp. dicoccoides		Armenia	40.285	44.6167	north	other
PI 414718	84	Emmer - wild	Triticum turgidum subsp. dicoccoides		Israel	32.9103	35.5978	south	south
PI 414719	85	Emmer - wild	Triticum turgidum subsp. dicoccoides		Israel	32.7194	35.3986	south	south
PI 414721	87	Emmer - wild	Triticum turgidum subsp. dicoccoides		Israel	32.9	35.5333	south	south	judaicum race
PI 414722	88	Emmer - wild	Triticum turgidum subsp. dicoccoides		Israel	32.9667	35.4944	south	south
PI 428013	90	Emmer - wild	Triticum turgidum subsp. dicoccoides		Israel	32.9667	35.5333	south	south
PI 428014	91	Emmer - wild	Triticum turgidum subsp. dicoccoides		Israel	31.7933	35.2333	south	south
PI 428015	92	Emmer - wild	Triticum turgidum subsp. dicoccoides		Israel	32.7687	35.5	south	south
PI 428016	93	Emmer - wild	Triticum turgidum subsp. dicoccoides		Iran	34.3667	46.1	east	other
PI 428017	94	Emmer - wild	Triticum turgidum subsp. dicoccoides		Turkey	37.3	36.8	north	other
PI 428053	96	Emmer - wild	Triticum turgidum subsp. dicoccoides		Turkey	37.8333	39.8167	Karaca Dağ	other
PI 428069	97	Emmer - wild	Triticum turgidum subsp. dicoccoides		Turkey	37.8667	39.8833	Karaca Dağ	other
PI 428077	98	Emmer - wild	Triticum turgidum subsp. dicoccoides		Turkey	37.7833	39.7667	Karaca Dağ	other
PI 428085	99	Emmer - wild	Triticum turgidum subsp. dicoccoides		Turkey	37.7167	39.5	Karaca Dağ	other
PI 428093	100	Emmer - wild	Triticum turgidum subsp. dicoccoides		Israel	32.6111	35.2917	south	south
PI 428100	101	Emmer - wild	Triticum turgidum subsp. dicoccoides		Israel	33.0067	35.5933	south	south
PI 428105	102	Emmer - wild	Triticum turgidum subsp. dicoccoides		Israel	32.8677	35.6333	south	south
PI 428125	103	Emmer - wild	Triticum turgidum subsp. dicoccoides		Lebanon	33.5011	35.8394	south	south
PI 428127	104	Emmer - wild	Triticum turgidum subsp. dicoccoides		Lebanon	33.6177	35.8667	south	south
PI 428141	105	Emmer - wild	Triticum turgidum subsp. dicoccoides		Lebanon	33.4333	35.7667	south	south
PI 428143	106	Emmer - wild	Triticum turgidum subsp. dicoccoides		Lebanon	33.5	35.8333	south	south
PI 428145	107	Emmer - wild	Triticum turgidum subsp. dicoccoides		Turkey	37.2833	41.6	north	other
PI 466927	110	Emmer - wild	Triticum turgidum subsp. dicoccoides		Syria	32.99	35.69	south	south
PI 466981	112	Emmer - wild	Triticum turgidum subsp. dicoccoides		Israel	31.8	35.0333	south	south
PI 466996	114	Emmer - wild	Triticum turgidum subsp. dicoccoides		Israel	32.26	35.01	south	south
PI 467004	115	Emmer - wild	Triticum turgidum subsp. dicoccoides		Israel	32.8667	35.5333	south	south
PI 470736	117	Emmer - wild	Triticum turgidum subsp. dicoccoides		Turkey	38.2167	39.8167	Karaca Dağ	other
PI 470978	118	Emmer - wild	Triticum turgidum subsp. dicoccoides		Lebanon	33.4177	35.8667	south	south
PI 470980	119	Emmer - wild	Triticum turgidum subsp. dicoccoides		Lebanon	33.5187	35.9667	south	south
PI 470988	120	Emmer - wild	Triticum turgidum subsp. dicoccoides		Israel	32.9957	35.5333	south	south
PI 471035	122	Emmer - wild	Triticum turgidum subsp. dicoccoides		Israel	31.95	35.3333	south	south
PI 487251	123	Emmer - wild	Triticum turgidum subsp. dicoccoides		Syria	32.5122	36.5786	south	south
PI 487252	124	Emmer - wild	Triticum turgidum subsp. dicoccoides		Syria	32.6132	36.6786	south	south
PI 487253	125	Emmer - wild	Triticum turgidum subsp. dicoccoides		Syria	32.8603	36.0772	south	south
PI 487261	126	Emmer - wild	Triticum turgidum subsp. dicoccoides		Syria	32.6267	36.7822	south	south
PI 487263	127	Emmer - wild	Triticum turgidum subsp. dicoccoides		Syria	36.2022	36.7758	north	other (reassigned to south)
PI 487264	128	Emmer - wild	Triticum turgidum subsp. dicoccoides		Syria	36.5	37	north	other (reassigned to south)
PI 538680	146	Emmer - wild	Triticum turgidum subsp. dicoccoides		Israel	32.9	35.5667	south	south	judaicum race
PI 538695	147	Emmer - wild	Triticum turgidum subsp. dicoccoides		Israel	32.5833	35.05	south	south
PI 538699	148	Emmer - wild	Triticum turgidum subsp. dicoccoides		Israel	31.8333	35.45	south	south
PI 538705	150	Emmer - wild	Triticum turgidum subsp. dicoccoides		Lebanon	33.5	35.8667	south	south
PI 538719	152	Emmer - wild	Triticum turgidum subsp. dicoccoides		Israel	32.8333	35.5	south	south
PI 554581	155	Emmer - wild	Triticum turgidum subsp. dicoccoides		Turkey	37.75	40.1	Karaca Dağ	other
PI 554582	156	Emmer - wild	Triticum turgidum subsp. dicoccoides		Turkey	37.47	39.46	Karaca Dağ	other
PI 554583	157	Emmer - wild	Triticum turgidum subsp. dicoccoides		Turkey	37.47	39.47	Karaca Dağ	other
PI 654311	175	Emmer - wild	Triticum turgidum subsp. dicoccoides		Turkey	36.5806	39.5342	north	other
PI 654317	176	Emmer - wild	Triticum turgidum subsp. dicoccoides		Turkey	37.8553	39.8164	Karaca Dağ	other
PI 654318	177	Emmer - wild	Triticum turgidum subsp. dicoccoides		Turkey	37.7461	39.6614	Karaca Dağ	other
PI 654319	178	Emmer - wild	Triticum turgidum subsp. dicoccoides		Turkey	37.4307	39.3511	Karaca Dağ	other
PI 654334	180	Emmer - wild	Triticum turgidum subsp. dicoccoides		Turkey	36.6228	37.305	north	other
PI 654336	181	Emmer - wild	Triticum turgidum subsp. dicoccoides		Turkey	36.5218	37.205	north	other
PI 656866	182	Emmer - wild	Triticum turgidum subsp. dicoccoides		Turkey	37.2294	37.515	north	other
PI 656867	183	Emmer - wild	Triticum turgidum subsp. dicoccoides		Turkey	37.2149	37.3219	north	other
PI 656868	184	Emmer - wild	Triticum turgidum subsp. dicoccoides		Turkey	37.241	37.3438	north	other
CGN06541	202	Emmer - wild	Triticum turgidum subsp. dicoccoides		Iraq	33.536	44.4333	east	other
CGN09954	207	Emmer - wild	Triticum turgidum subsp. dicoccoides		Iraq	33.34	44.5333	east	other
PI 427998	226	Emmer - wild	Triticum turgidum subsp. dicoccoides	Triticum timopheevii subsp. armeniacum	Lebanon	33.5167	35.8667	south	south
CGN08333	302	Emmer - wild	Triticum turgidum subsp. dicoccoides		Iraq	33.237	44.4333	east	other
IG 11508	303	Emmer - wild	Triticum turgidum subsp. dicoccoides		Jordan	31.9997	35.9328	south	south
IG 46483	304	Emmer - wild	Triticum turgidum subsp. dicoccoides		Jordan	31.9497	35.9328	south	south
K42632	321	Emmer - wild	Triticum turgidum subsp. dicoccoides		Iraq	33.3333	44.4333	east	other
K62358	322	Emmer - wild	Triticum turgidum subsp. dicoccoides		Syria	36.2167	37.1667	north	other (reassigned to south)
IG 109085	109085	Emmer - wild	Triticum turgidum subsp. dicoccoides		Iraq	36.3833	41.7833	north		Excluded from analysis because of >90% missing data
IG 113301	113301	Emmer - wild	Triticum turgidum subsp. dicoccoides		Iran	35.599	51.4231	east	other
IG 113302	113302	Emmer - wild	Triticum turgidum subsp. dicoccoides		Iran	35.798	51.4231	east	other
PI 40919	3b	Emmer - domesticated	Triticum turgidum subsp. dicoccum		India	21.9667	70.5		yes
PI 94641	8b	Emmer - domesticated	Triticum turgidum subsp. dicoccum		Germany	52.5167	13.3833		yes
PI 94660	9b	Emmer - domesticated	Triticum turgidum subsp. dicoccum		Russia	57.57	38.24		yes
PI 94670	11b	Emmer - domesticated	Triticum turgidum subsp. dicoccum		Iran	35.902	51.6231
PI 94683	12b	Emmer - domesticated	Triticum turgidum subsp. dicoccum		Armenia	40.386	44.7167
PI 94747	13b	Emmer - domesticated	Triticum turgidum subsp. dicoccum		Georgia	41.717	44.7833
PI 182743	14b	Emmer - domesticated	Triticum turgidum subsp. dicoccum		Turkey	37.2148	40.1616
PI 194375	16b	Emmer - domesticated	Triticum turgidum subsp. dicoccum		Ethiopia	7.66667	36.8333		yes
PI 197481	17b	Emmer - domesticated	Triticum turgidum subsp. dicoccum		Ethiopia	9.19	42.07		yes
PI 254153	19b	Emmer - domesticated	Triticum turgidum subsp. dicoccum		Iran	35.801	51.5231
PI 326312	22b	Emmer - domesticated	Triticum turgidum subsp. dicoccum		Georgia	43.0006	43.1122
PI 347230	23b	Emmer - domesticated	Triticum turgidum subsp. dicoccum		Iran	32	53
PI 348620	24b	Emmer - domesticated	Triticum turgidum subsp. dicoccum		Spain	43.3333	-6		yes
PI 470737	26b	Emmer - domesticated	Triticum turgidum subsp. dicoccum		Turkey	40.46	43.17
PI 113393	29	Emmer - domesticated	Triticum turgidum subsp. dicoccum	Triticum turgidum subsp. turanicum	Iraq	33.342	44.7333
PI 624903	29b	Emmer - domesticated	Triticum turgidum subsp. dicoccum		Iran	36.14	46.16
PI 626468	30b	Emmer - domesticated	Triticum turgidum subsp. dicoccum		Iran	32.41	51.41
PI 532300	143	Emmer - domesticated	Triticum turgidum subsp. dicoccum		Oman	23.1	57.2		yes
CGN12278	203	Emmer - domesticated	Triticum turgidum subsp. dicoccum		Iran	35.703	51.4231
CGN08031	205	Emmer - domesticated	Triticum turgidum subsp. dicoccum		Israel	31.784	35.2267
CGN12279	206	Emmer - domesticated	Triticum turgidum subsp. dicoccum		Iran	35.804	51.5231
PI 182743	208	Emmer - domesticated	Triticum turgidum subsp. dicoccum		Turkey	37.3633	40.2711
PI 470739	209	Emmer - domesticated	Triticum turgidum subsp. dicoccum		Turkey	40.7667	43.2833
CGN08104	211	Emmer - domesticated	Triticum turgidum subsp. dicoccum		Israel	31.8034	35.1167
PI 415152	212	Emmer - domesticated	Triticum turgidum subsp. dicoccum		Israel	31.9733	35.4667
PI 606325	213	Emmer - domesticated	Triticum turgidum subsp. dicoccum		Turkey	41.4158	35.0544
PI 190974	223	Emmer - domesticated	Triticum turgidum subsp. dicoccum	Triticum timopheevii subsp. timopheevii	Italy	40.845	14.2583		yes	Accession is mixture of T. turgidum and T. timopheevii (see Table S5)
TRI 2884	233	Emmer - domesticated	Triticum turgidum subsp. dicoccum		Morocco	34.0333	-5		yes
TRI 27970	234	Emmer - domesticated	Triticum turgidum subsp. dicoccum		Egypt	31.2	29.9167		yes
TRI 28861	235	Emmer - domesticated	Triticum turgidum subsp. dicoccum		Yemen	13.95	44.1833		yes
TRI 6158	236	Emmer - domesticated	Triticum turgidum subsp. dicoccum		Iran	32.33	50.51
TRI 6141	238	Emmer - domesticated	Triticum turgidum subsp. dicoccum		Iran	35.7	51.4231
TRI 28042	239	Emmer - domesticated	Triticum turgidum subsp. dicoccum		France	43.2964	5.37		yes
TRI 14077	240	Emmer - domesticated	Triticum turgidum subsp. dicoccum		Italy	40.425	15.2812		yes
TRI 18260	241	Emmer - domesticated	Triticum turgidum subsp. dicoccum		Italy	40.0959	18.21		yes
TRI 5860	245	Emmer - domesticated	Triticum turgidum subsp. dicoccum		Iran	37.38	46.47
TRI 16879	246	Emmer - domesticated	Triticum turgidum subsp. dicoccum		Israel	31.7833	35.2167
TRI 17040	247	Emmer - domesticated	Triticum turgidum subsp. dicoccum		Turkey	41.0136	28.955
TRI 3424	248	Emmer - domesticated	Triticum turgidum subsp. dicoccum		Israel	31.7633	35.3167
TRI 17023	249	Emmer - domesticated	Triticum turgidum subsp. dicoccum		Turkey	41.41	33.43
TRI 17038	250	Emmer - domesticated	Triticum turgidum subsp. dicoccum		Turkey	41.1	35.51
TRI 584	306	Emmer - domesticated	Triticum turgidum subsp. dicoccum		Turkey	39.9333	32.8667
PI 94633	94633	Emmer - domesticated	Triticum turgidum subsp. dicoccum		Morocco	34.0209	-6.84165		yes
PI 352492	73	Emmer - domesticated	Triticum ispahanicum		Iran	35.6961	51.4231
CItr 3117	2	Durum - domesticated	Triticum turgidum subsp. durum		Tunisia	33.33	9.58		yes
PI 7422	4	Durum - domesticated	Triticum turgidum subsp. durum		Egypt	26.2045	31.531		yes
CItr 14600	10	Durum - domesticated	Triticum turgidum subsp. durum		Ethiopia	8.5	38.58		yes
PI 27514	16	Durum - domesticated	Triticum turgidum subsp. durum		Georgia	41.38	41.38
PI 52503	18	Durum - domesticated	Triticum turgidum subsp. durum		Israel	32.4245	35.3143
PI 61164	23	Durum - domesticated	Triticum turgidum subsp. durum		Russia	43.48	131.59		yes
PI 94684	26	Durum - domesticated	Triticum turgidum subsp. durum		Armenia	40.3	45
PI 178043	37	Durum - domesticated	Triticum turgidum subsp. durum		Turkey	39.9667	28.1167
PI 178753	38	Durum - domesticated	Triticum turgidum subsp. durum		Iraq	35.55	45.43
PI 182666	39	Durum - domesticated	Triticum turgidum subsp. durum		Lebanon	33.7619	35.8803
PI 182674	40	Durum - domesticated	Triticum turgidum subsp. durum		Lebanon	33.7167	35.9167
PI 182705	41	Durum - domesticated	Triticum turgidum subsp. durum		Syria	34.44	36.43
PI 183521	43	Durum - domesticated	Triticum turgidum subsp. durum		India	20.54	70.22		yes
PI 192826	47	Durum - domesticated	Triticum turgidum subsp. durum		Portugal	40.09	-8.52		yes
PI 193390	48	Durum - domesticated	Triticum turgidum subsp. durum		Syria	32.45	36.29
PI 244037	53	Durum - domesticated	Triticum turgidum subsp. durum		Spain	37.15	-3.15		yes
PI 264941	57	Durum - domesticated	Triticum turgidum subsp. durum		Italy	37.38	14.46		yes
PI 268298	58	Durum - domesticated	Triticum turgidum subsp. durum		Iran	30.23	50.13
PI 367194	80	Durum - domesticated	Triticum turgidum subsp. durum		Afghanistan	34.32	62.43		yes
PI 420943	89	Durum - domesticated	Triticum turgidum subsp. durum		Jordan	31.1	35.39
PI 430747	108	Durum - domesticated	Triticum turgidum subsp. durum		Yemen	17.04	43.35		yes
PI 487290	129	Durum - domesticated	Triticum turgidum subsp. durum		Jordan	32.42	35.52
PI 525339	133	Durum - domesticated	Triticum turgidum subsp. durum		Morocco	29.45	-8		yes
PI 560883	162	Durum - domesticated	Triticum turgidum subsp. durum		Turkey	38.01	42.07
PI 572901	164	Durum - domesticated	Triticum turgidum subsp. durum		Israel	32.005	35.0401
PI 576837	167	Durum - domesticated	Triticum turgidum subsp. durum		Turkey	37.53	38.47
PI 631158	173	Durum - domesticated	Triticum turgidum subsp. durum		Iran	33.36	47.53
CItr 14625	11	Rivet wheat - domesticated	Triticum turgidum subsp. turgidum		Ethiopia	8.51	38.25		yes
PI 57661	21	Rivet wheat - domesticated	Triticum turgidum subsp. turgidum		Egypt	28.18	30.39		yes
PI 94689	27	Rivet wheat - domesticated	Triticum turgidum subsp. turgidum		Armenia	40.1833	44.5			Excluded from analysis because of >90% missing data
PI 125343	30	Rivet wheat - domesticated	Triticum turgidum subsp. turgidum		Afghanistan	34.31	70.17		yes
PI 166496	34	Rivet wheat - domesticated	Triticum turgidum subsp. turgidum		Turkey	37.8444	27.8458			Excluded from analysis because of >90% missing data
PI 185728	44	Rivet wheat - domesticated	Triticum turgidum subsp. turgidum		Portugal	37.4348	-8.24		yes
PI 208912	49	Rivet wheat - domesticated	Triticum turgidum subsp. turgidum		Iraq	33.343	44.8333
PI 278221	60	Rivet wheat - domesticated	Triticum turgidum subsp. turgidum		United Kingdom	53	-2		yes
PI 352544	76	Rivet wheat - domesticated	Triticum turgidum subsp. turgidum		Switzerland	46.32	6.39		yes
PI 525376	135	Rivet wheat - domesticated	Triticum turgidum subsp. turgidum		Morocco	30.42	-8.09		yes
PI 623927	168	Rivet wheat - domesticated	Triticum turgidum subsp. turgidum		Iran	34.0642	46.3142
PI 10391	7	Khorasan wheat - domesticated	Triticum turgidum subsp. turanicum		Egypt	30.02	31.13		yes
CItr 14598	9	Khorasan wheat - domesticated	Triticum turgidum subsp. turanicum		Ethiopia	8.55	38.58		yes
PI 317491	63	Khorasan wheat - domesticated	Triticum turgidum subsp. turanicum		Afghanistan	34.5167	65.1333		yes
PI 525355	134	Khorasan wheat - domesticated	Triticum turgidum subsp. turanicum		Morocco	32.1048	-9.1612		yes
PI 624207	169	Khorasan wheat - domesticated	Triticum turgidum subsp. turanicum		Iran	34.19	47.04
PI 167622	36	Polish wheat - domesticated	Triticum turgidum subsp. polonicum		Turkey	39.9136	28.1578
PI 210845	50	Polish wheat - domesticated	Triticum turgidum subsp. polonicum		Iran	35.905	51.6231
PI 245663	54	Polish wheat - domesticated	Triticum turgidum subsp. polonicum		Afghanistan	35	71		yes
PI 349051	70	Polish wheat - domesticated	Triticum turgidum subsp. polonicum		Georgia	42.3706	45.6325
PI 366117	79	Polish wheat - domesticated	Triticum turgidum subsp. polonicum		Egypt	31.0728	33.4802		yes
PI 94748	28	Persian wheat - domesticated	Triticum turgidum subsp. carthlicum		Georgia	41.7167	44.7833
PI 283889	62	Persian wheat - domesticated	Triticum turgidum subsp. carthlicum		Iran	35.697	51.4231
PI 470729	116	Persian wheat - domesticated	Triticum turgidum subsp. carthlicum		Turkey	40.4167	42.6833
