# Supplementary material for: Multiregional origins of the domesticated tetraploid wheats
Source: PLoS One. 2020 Jan 22;15(1):e0227148. doi: 10.1371/journal.pone.0227148 (PMC6975532; doi:10.1371/journal.pone.0227148)
Supplement: S4 Table — (XLSX) [file pone.0227148.s012.xlsx]

## Sheet: S4 Table
S4 Table. SNP summary statistics for individual taxa.
					Genetic diversity
Taxon	Number of accessions	Missing data	Heterozygous sites	π	θ	Tajima's D	Average minor allele frequency	F
T. timopheevii subsp. armeniacum	21	0.60302	0.04265	0.14597	0.12357	1.17365	0.06108	0.279114
T. timopheevii subsp. timopheevii	7	0.53032	0.05813	0.12611	0.13349	-0.27851	0.05199	0.0408229
T. turgidum subsp. dicoccoides	65	0.46909	0.03844	0.14784	0.18482	-0.8128	0.10724	0.590783
north	12	0.45982	0.0393	0.13529	0.16167	-1.12553	0.08054	0.51784
Karaca Dağ	11	0.48806	0.03512	0.11419	0.13028	-1.13364	0.06025	0.424785
east	7	0.47555	0.0401	0.12711	0.15176	-0.73336	0.06387	0.438687
south	35	0.46502	0.03886	0.14363	0.17315	-0.78935	0.09734	0.566303
north+Karaca Dağ+east	30	0.47936	0.03724	0.13197	0.15766	-0.81885	0.08846	0.471437
T. turgidum subsp. dicoccum	43	0.46396	0.03848	0.12409	0.14106	-0.52903	0.0846	0.494275
Naked wheats	49	0.48971	0.03546	0.10911	0.11226	-0.12181	0.07159	0.431225
T. turgidum subsp. durum	27	0.51004	0.03361	0.10238	0.10665	-0.20922	0.06151	0.390137
T. turgidum subsp. turgidum	9	0.49938	0.03465	0.11191	0.13522	-4.33961	0.03536	0.400951
T. turgidum subsp. turanicum	5	0.449056	0.0398967	0.10675	0.15286	-2.36069	0.04744	0.300394
T. turgidum subsp. polonicum	5	0.482296	0.0342206	0.10384	0.13829	-0.88491	0.04289	0.334094
T. turgidum subsp. carthlicum	3	0.357808	0.0492795	0.07427	0.09383	-0.40931	0.03286	-0.0790433
